# Supplementary material for: Behavior Change Techniques and Their Mechanisms of Action: A Synthesis of Links Described in Published Intervention Literature
Source: PubMed Central journal article supplement (PMC6636886; doi:10.1093/abm/kay078), 2018-10-10
Supplement: kay078_suppl_supplementary_file_1.pdf [file kay078_suppl_supplementary_file_1.pdf]

### Supplementary File 1: Inter-coder reliability for intervention report coding

| <b>Stage of coding</b> | <b>Index</b>         | <b>Reliability</b> | <b># Papers coded before reliability achieved</b> |
|------------------------|----------------------|--------------------|---------------------------------------------------|
| Screening              | Kappa                | 0.9                | 22                                                |
| BCT Coding             | PABAK                | 0.9                | 93                                                |
| Link Coding            | Percentage Agreement | 90%                | 183                                               |

*Note:* Since there was not a 'finite' number of possible MoAs, we used percentage agreement – and not Kappa – for links coding.
