# Supplementary material for: Behavior Change Techniques and Their Mechanisms of Action: A Synthesis of Links Described in Published Intervention Literature
Source: PubMed Central journal article supplement (PMC6636886; doi:10.1093/abm/kay078), 2018-10-10
Supplement: kay078_suppl_supplementary_file_3.pdf [file kay078_suppl_supplementary_file_3.pdf]

### Supplementary File 3: Guidelines for Categorisation of Mechanisms

- Read and re-read the 26 MoA labels and definitions (in BCT-MoA Link Coding Guidelines)
- Ensure all decisions are based on **definitions**, not labels
- If definition is given and clearly fits **one** of the 26 MoA definitions, add label and number of MoA in spreadsheet
- If definition is given and fits into **more than one** of the 26 MoA definitions (e.g. a definition encompasses both attitude towards behaviour AND beliefs about consequences), highlight in yellow for review
- If definition is given and unsure which of the 26 MoA definitions it fits into, highlight in yellow for review
- If **no** definition given:
  - o Double-check PDF and add any relevant information where possible (e.g. how MoA was measured or what theory it came from)
    - If no additional information found and/or still unclear, highlight in yellow for review
  - o If the definition says ‘as per [theory]’ – check the theory definition, if not clear, highlight in yellow for review
- Where categorisation of MoAs **within one paper** means that there are multiple identical links, highlight these in yellow. For example, where intrinsic motivation is linked to BCT X and Y, and extrinsic motivation is linked to BCT X and Y, and these are both categorised into ‘Motivation’ (meaning Motivation is linked to BCT X and Y twice), highlight these BCT numbers in yellow in the Links spreadsheet (see examples of this in rows 51-58).
- Where no definition given but label is exactly label of one of the 26 MoAs, ok to categorise as such (this includes self-efficacy → beliefs about capabilities, outcome expectancies → beliefs about consequences, and social support → social influences).
- For uncertain MoAs:
  - o Check whether construct is similar/identical to one of the component constructs of the TDF domain or frequently occurring MoA
  - o If no definition or information given about construct in paper, and label is not similar to any MoA, code as ‘other’.

#### Examples of Construct Definitions from Theories (to be used where authors define an MoA ‘as per X theory’)

| Construct Label          | Construct Definition (from theory)                                                                                                                                  | Mechanism of Action Categorisation           |
|--------------------------|---------------------------------------------------------------------------------------------------------------------------------------------------------------------|----------------------------------------------|
| Intention                | TPB: The cognitive representation of one's readiness to perform the behaviour; considered to be the immediate antecedent of behaviour                               | Intention (8)                                |
| Attitude                 | TPB: Favourable or unfavourable evaluation or appraisal of the behaviour                                                                                            | Attitude towards the behaviour (17)          |
| Perceived Susceptibility | HBM: The extent to which one believes one is at risk of contracting a particular disease or developing a particular health problem                                  | Perceived Susceptibility/ Vulnerability (26) |
| Perceived Threat         | HBM: Perceptions of the threat posed by a disease or health problem, based on one's perceived susceptibility to, and the perceived severity of, a disease or health | Perceived Susceptibility/ Vulnerability (26) |

|                               |                                                                                                                                     |                                |
|-------------------------------|-------------------------------------------------------------------------------------------------------------------------------------|--------------------------------|
|                               | problem                                                                                                                             |                                |
| Perceived Behavioural Control | TPB: The perceived ability to perform the behaviour                                                                                 | Beliefs about Capabilities (4) |
| Self-Efficacy                 | SCT: Perceived judgements of one's ability to cope effectively in different circumstances                                           | Beliefs about Capabilities (4) |
| Self-Efficacy                 | SET: Belief that one is capable of carrying out a specific behaviour that will lead to desired outcomes                             | Beliefs about Capabilities (4) |
| Behavioural Intention         | HAPA: A conscious decision to perform a behaviour                                                                                   | Intention (8)                  |
| Self-Regulation               | HAPA (Action Control?): Actual or perceived environmental factors that prevent performance of an intended behaviour                 | Behavioural Regulation (14)    |
| Motivation                    | I-change: One's intention to carry out a particular type of behaviour; determined by attitudes, social influences and self-efficacy | Intention (8)                  |

#### Inter-Coder Reliability

| Index                | Reliability (of MoAs not highlighted in yellow) | # MoAs categorised before reliability achieved |
|----------------------|-------------------------------------------------|------------------------------------------------|
| Percentage Agreement | 90%                                             | 20                                             |
